# Supplementary material for: Redox/ATP switchable theranostic nanoparticles for real-time fluorescence monitoring of doxorubicin delivery
Source: Royal Society of Chemistry journal article supplement (doi:10.1039/c7tb03325g), 2018-01-01
Supplement: c7tb03325g1.pdf [file c7tb03325g1.pdf]

## Electronic Supplementary Information (ESI)

### **Redox/ATP switchable theranostic nanoparticles for real-time fluorescence monitoring of doxorubicin delivery.**

Yi Lin,<sup>a</sup> Yidi Yang,<sup>a</sup> Jianqin Yan,<sup>a</sup> Jun Chen,<sup>a</sup> Jun Cao,<sup>a</sup> Yuji Pu,<sup>a</sup> Li Li<sup>\*a</sup> and Bin He<sup>a</sup>

<sup>a</sup>National Engineering Research Center for Biomaterials, Sichuan University, Chengdu  
610064, China

Corresponding authors:

Associate Prof. Li Li

Tel: +86 28 8547 0770

Fax: +86 28 8541 2848

Email: li\_li@scu.edu.cn

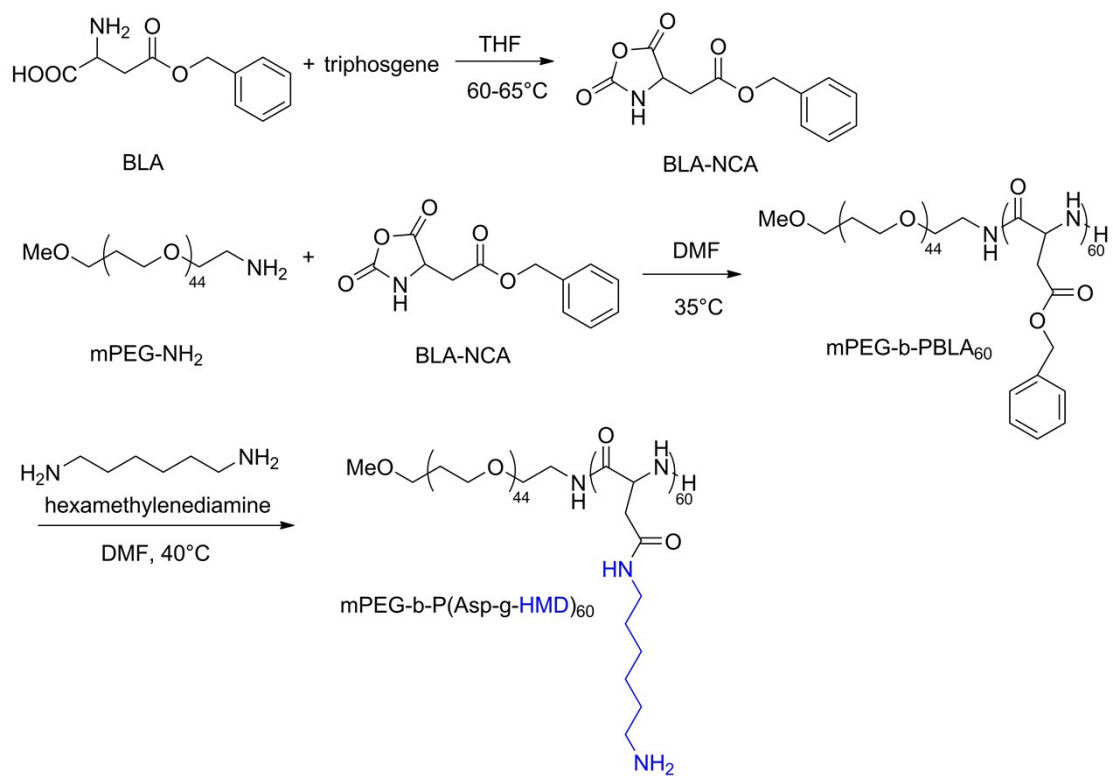

**Supplementary Scheme 1.** The synthesis for non-responsive cationic polymers mPEG-*b*-P(Asp-*g*-HMD)<sub>60</sub>.

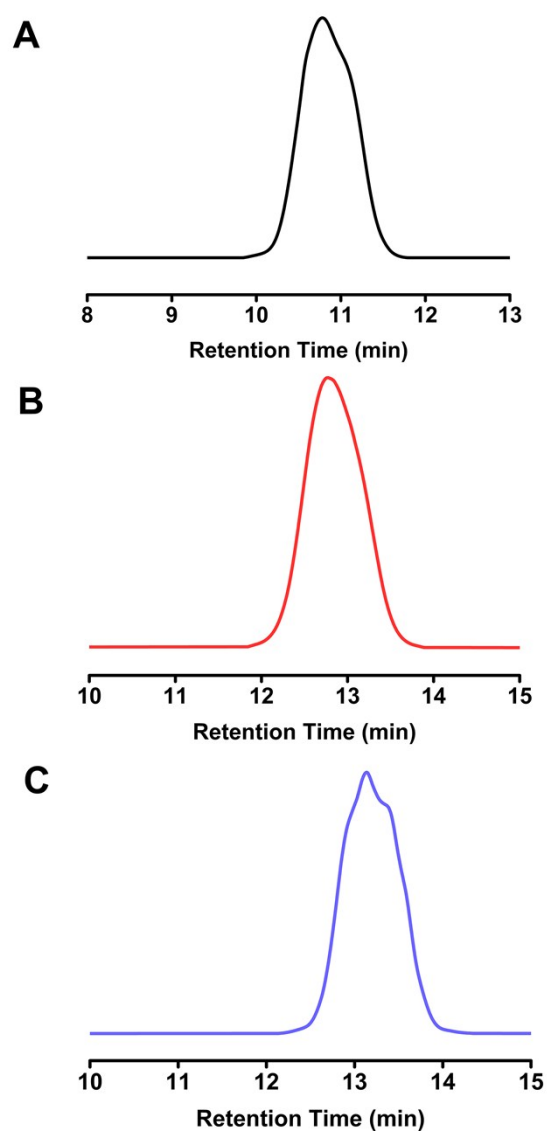

**D**

| polymer                                                 | Mn    | PD   |
|---------------------------------------------------------|-------|------|
| (A) mPEG- <i>b</i> -PBLA <sub>60</sub>                  | 17166 | 1.14 |
| (B) mPEG- <i>b</i> -P(Asp- <i>g</i> -CYS) <sub>60</sub> | 19940 | 1.09 |
| (C) mPEG- <i>b</i> -P(Asp- <i>g</i> -HMD) <sub>60</sub> | 18143 | 1.12 |

**Supplementary Fig. 1** (A-C) GPC chromatograms of mPEG-*b*-PBLA<sub>60</sub> (A), mPEG-*b*-P(Asp-*g*-CYS)<sub>60</sub> (B), and mPEG-*b*-P(Asp-*g*-HMD)<sub>60</sub> (C). (D) The number average molecular weight and polydispersity of polymers.

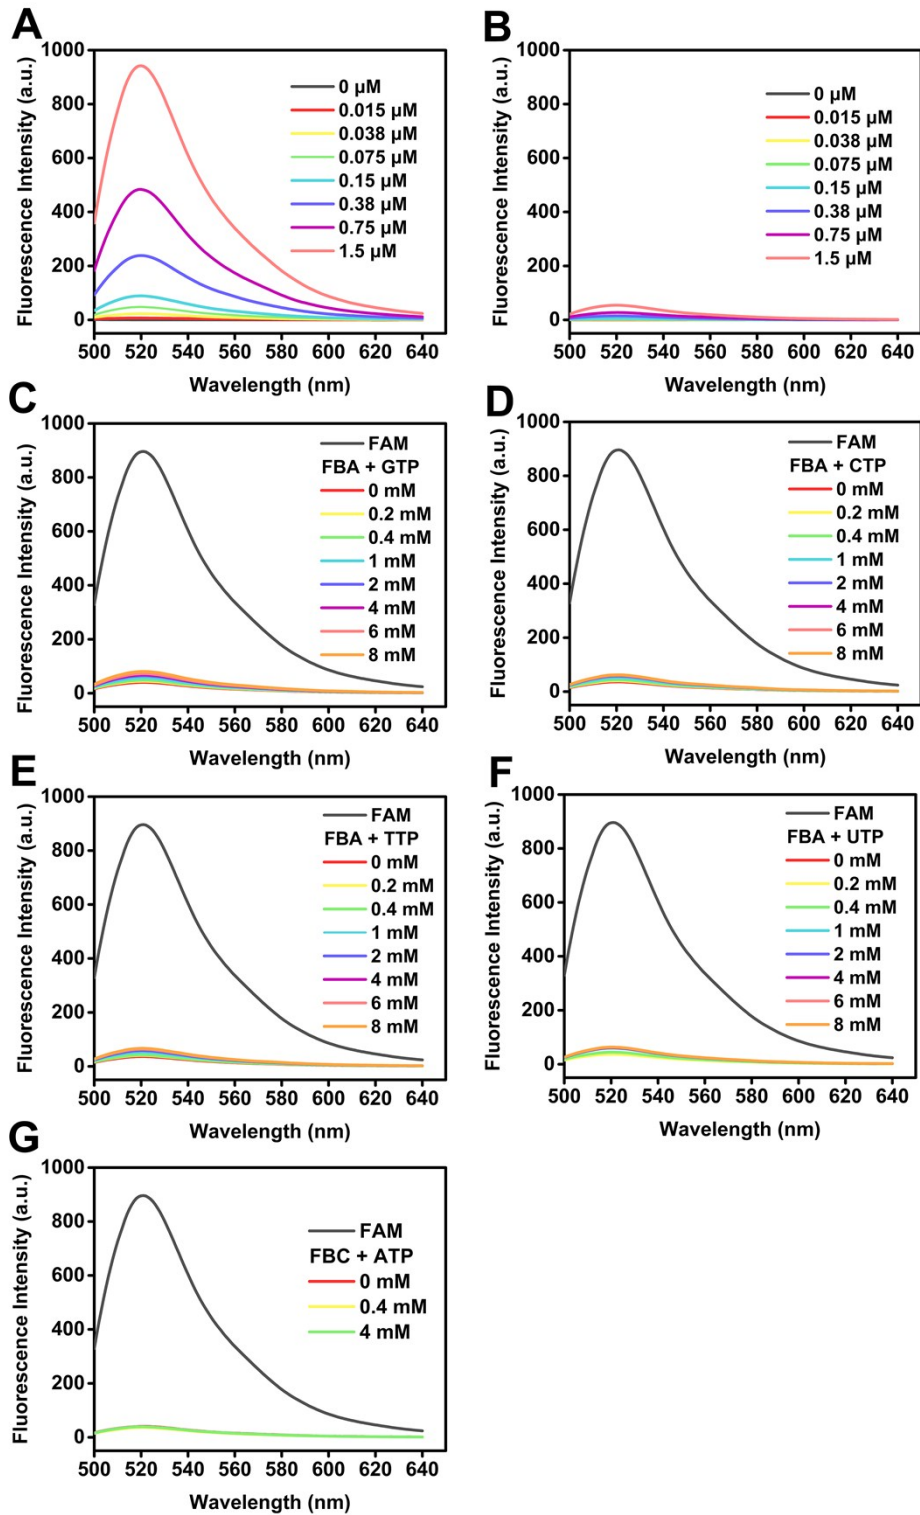

**Supplementary Fig. 2** (A-B) The fluorescence spectra of unquenched FAM-labelled ATP-sensitive DNA duplex (A) and FBA (B) at various concentrations. (C-F) The fluorescence of FBA (0.5  $\mu\text{M}$ ) in the presence of 4 mM GTP (C), CTP (D), TTP (E), or UTP (F) for 15 min. (G) The fluorescence of FBC (0.5  $\mu\text{M}$ ) in the presence of 4 mM ATP for 15 min.

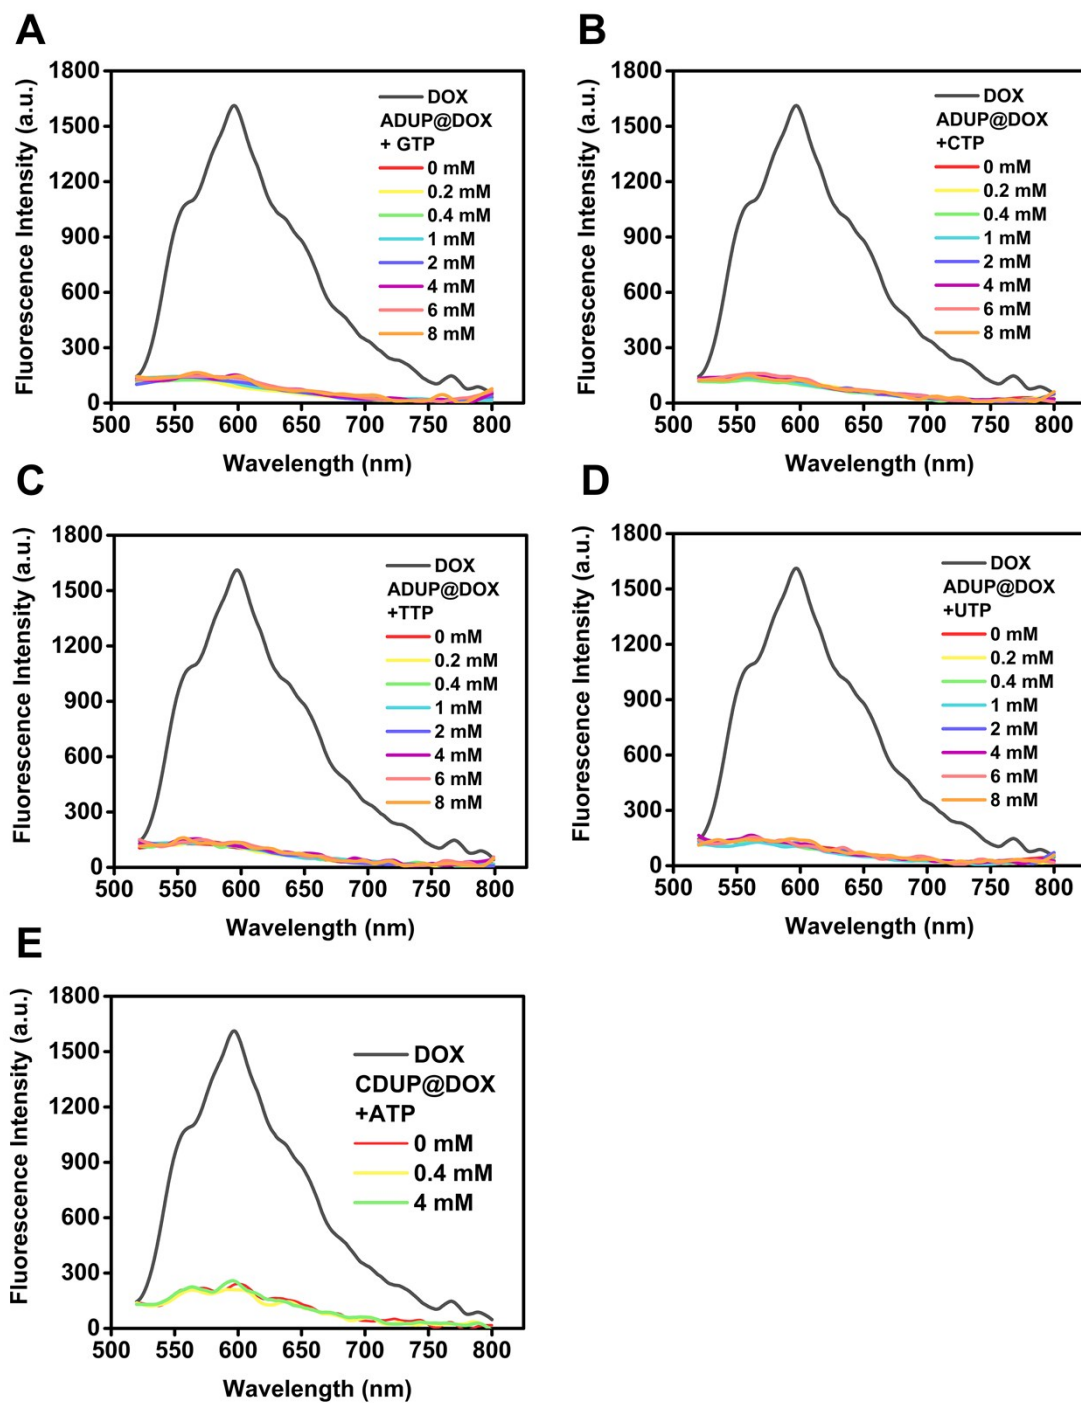

**Supplementary Fig. 3** (A-D) The fluorescence spectra of ADUP@DOX in the presence of 4 mM GTP (A), CTP (B), TTP (C), or UTP (D) for 15 min. (E) The fluorescence spectra of CDUP@DOX in the presence of 4 mM ATP for 15 min.

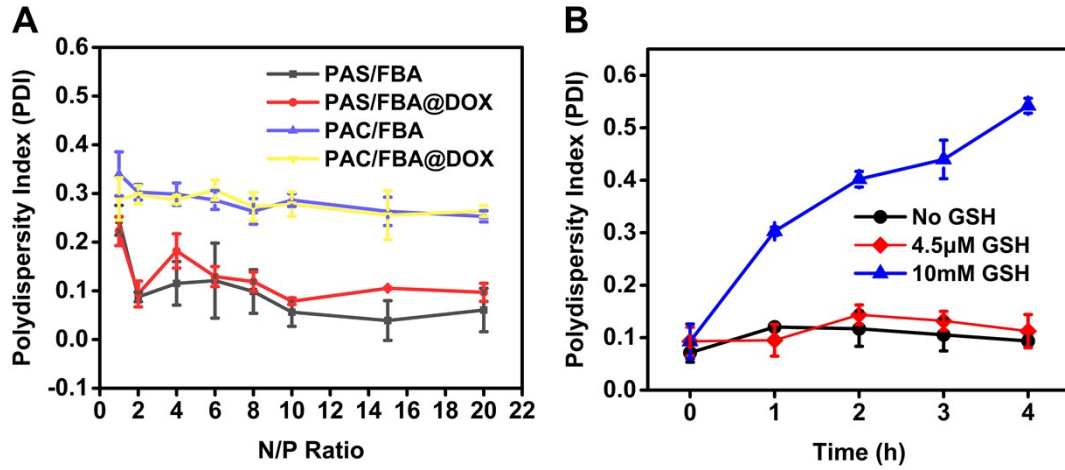

**Supplementary Fig. 4** (A) The polydispersity index (PDI) of PAS/FBA, PAC/FBA, PAS/FBA@DOX and PAC/FBA@DOX TNs at various N/P ratio from 1 to 20. Error bars indicate SD (n=3). (B) The polydispersity index (PDI) of PAS/ADUP@DOX TNs in the presence of 10 mM GSH at different time (0, 1, 2, 3, and 4 h). Error bars indicate SD (n=3).

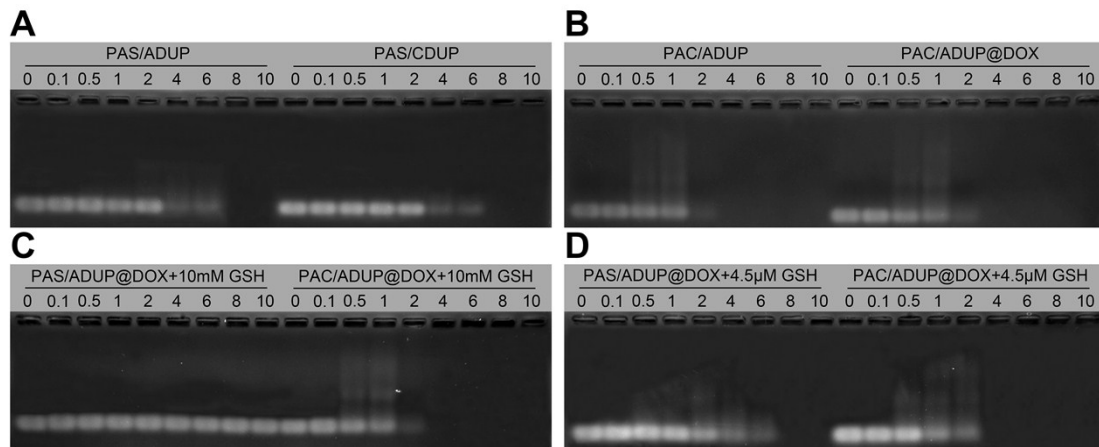

**Supplementary Fig. 5** (A) Agarose gel electrophoresis retardation of PAS/ADUP and PAS/CDUP at various N/P ratio from 0.1 to 10. (B) Agarose gel electrophoresis retardation of PAC/ADUP and PAC/ADUP@DOX TNs at various N/P ratio from 0.1 to 10. (C-D) Agarose gel electrophoresis retardation of PAS/ADUP@DOX and PAC/ADUP@DOX TNs after incubation with 10 mM GSH (C) or 4.5 μM GSH (D) for 2 h.

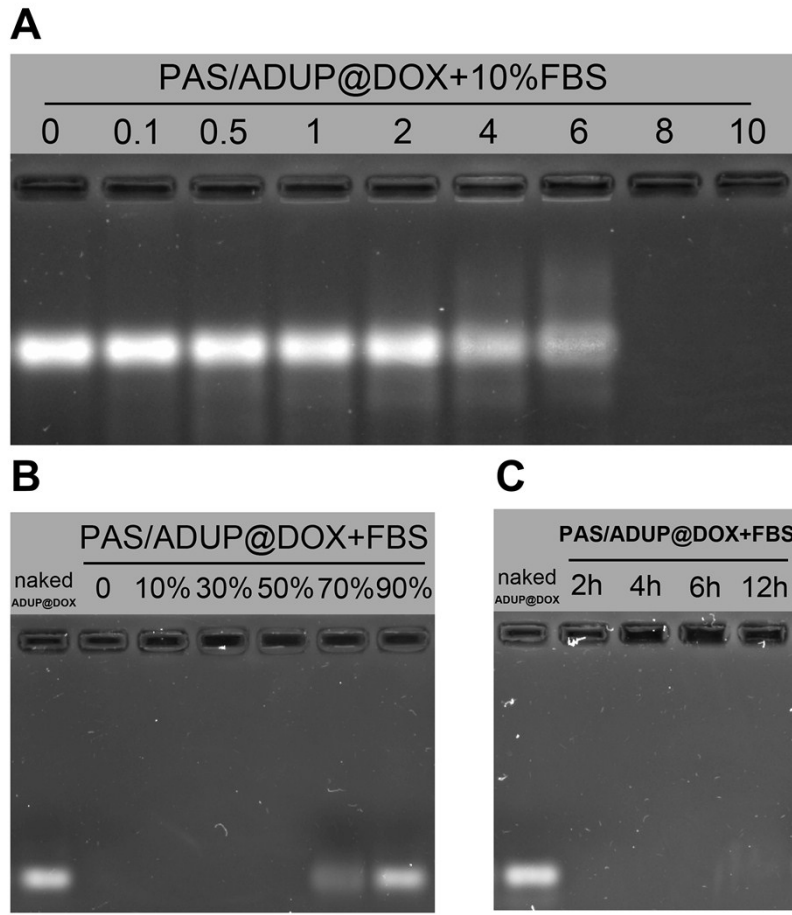

**Supplementary Fig. 6** (A) Agarose gel electrophoresis retardation of PAS/ADUP@DOX in 10% FBS at various N/P ratio from 0.1 to 10. (B) Agarose gel electrophoresis retardation of PAS/ADUP@DOX at an N/P ratio of 10 in a series of content of FBS from 0 to 90%. (C) Agarose gel electrophoresis retardation of PAS/ADUP@DOX at an N/P ratio of 10 after incubation with 10% FBS at various time from 2 h to 12 h.



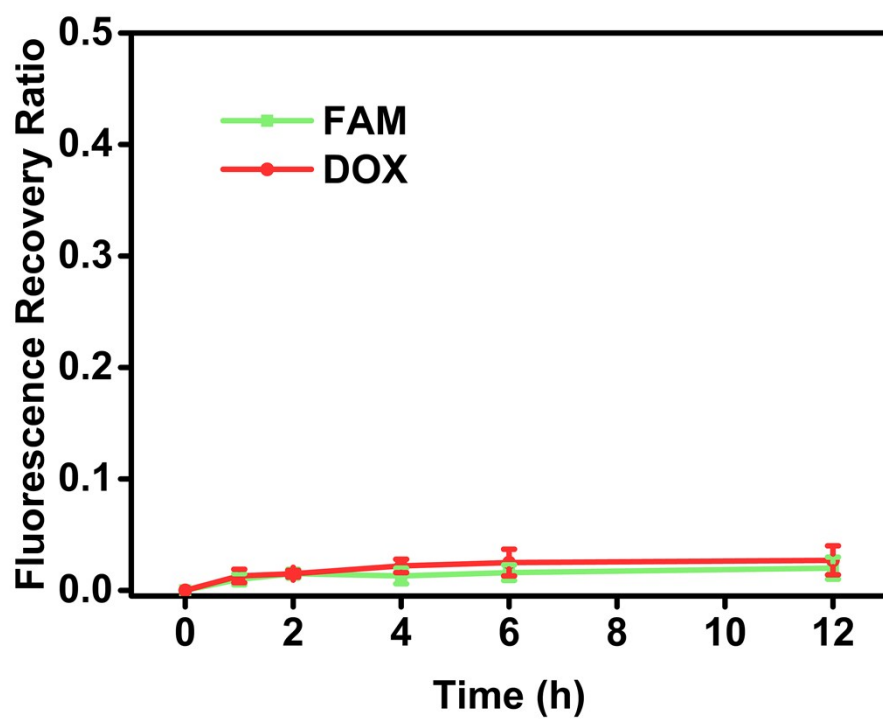

**Supplementary Fig. 7** Fluorescence recovery ratios of FAM and DOX of PAS/FBA@DOX TNs in the presence of 10% FBS at various time from 1 h to 12 h. Error bars indicate SD (n =3).

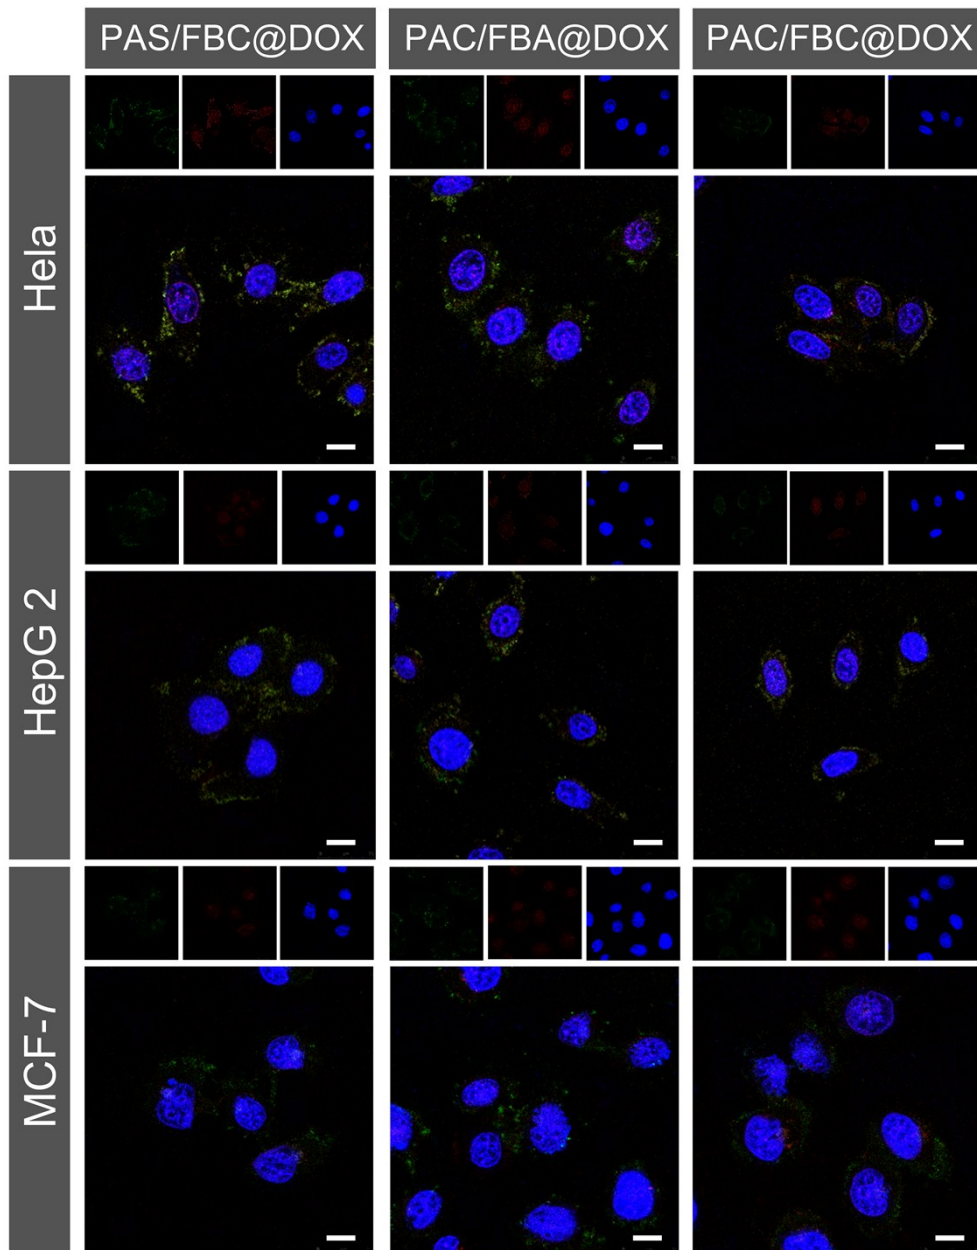

**Supplementary Fig. 8** Cellular uptake and intracellular FAM imaging and DOX distribution of control

TNs HeLa, HepG 2 and MCF-7 cells after 4 h incubation observed by CLSM. Blue: the nuclei stained by

Hoechst 33342; Green: FAM; Red: DOX. Scale bars are 10 µm.

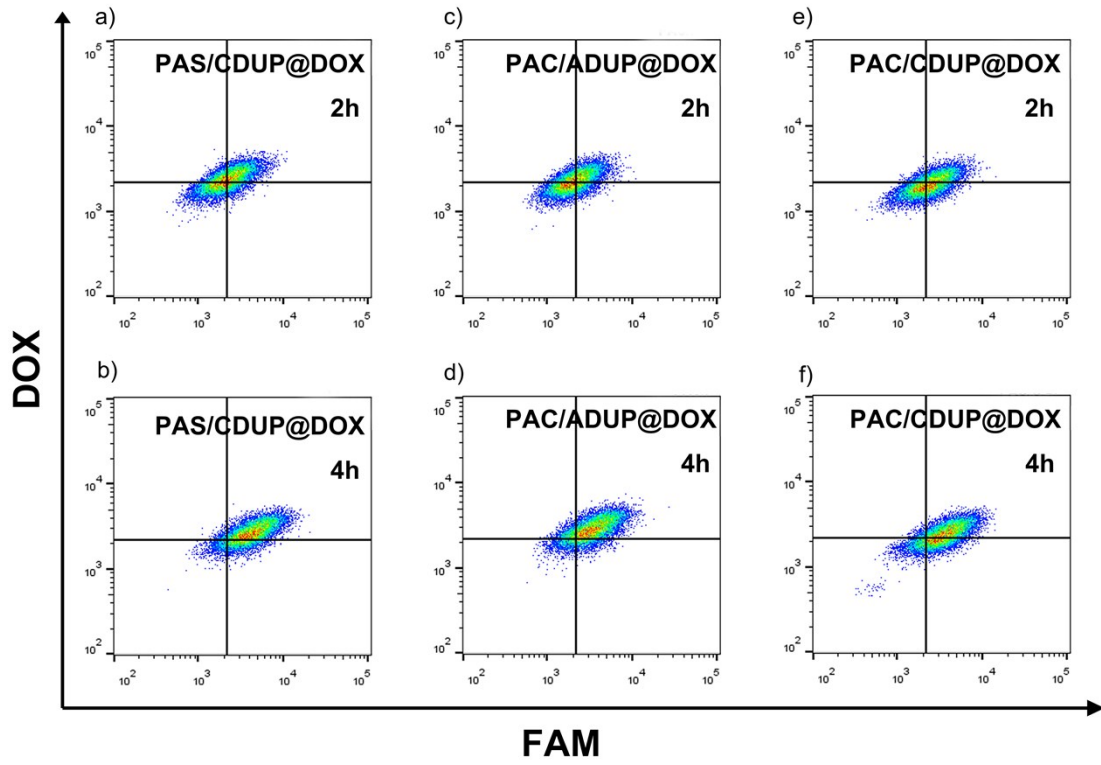

**Supplementary Fig. 9** The fluorescent intensity of FAM and DOX of control TNs in HeLa cells at 2 h and 4 h by flow cytometry.
